# Supplementary material
Source: PubMed Central journal article supplement (PMC5526748)
Supplement: NIHMS834155-supplement-supp_figs.pdf [file NIHMS834155-supplement-supp_figs.pdf]

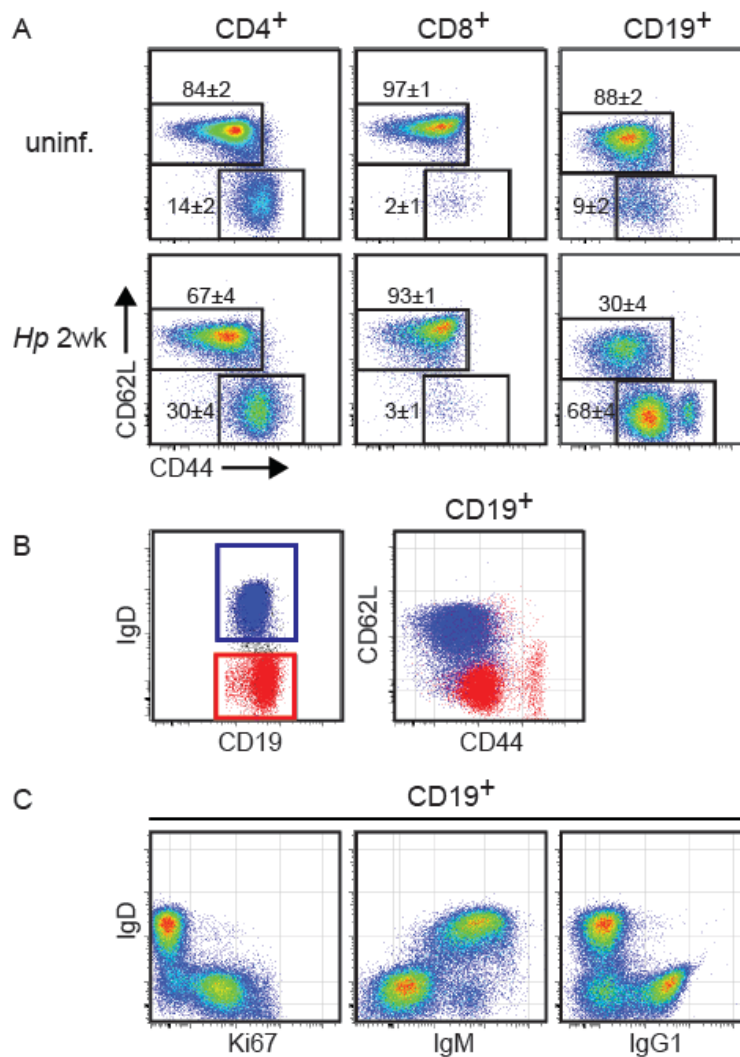

**Figure S1. Phenotyping of naive and effector lymphocyte populations.** BALB/c mice were infected with *Hp* or remained naive and the mesLN were analyzed 2 weeks later by flow cytometry. (A) FACS plots are gated on CD4<sup>+</sup>, CD8<sup>+</sup>, and CD19<sup>+</sup> cells as indicated and analyzed for CD44 and CD62L expression. Consistent with the commonly classification applied to T lymphocytes CD44<sup>lo</sup>CD62L<sup>hi</sup> cells were consider naive and CD44<sup>hi</sup>CD62L<sup>lo</sup> cells were consider effector/effector memory cells. (B) The CD44/CD62L classification was validated for B lymphocytes since naive phenotype CD44<sup>lo</sup>CD62L<sup>hi</sup> CD19<sup>+</sup> cells were homogenously IgD<sup>+</sup> whereas CD44<sup>hi</sup>CD62L<sup>lo</sup> cells were IgD<sup>-</sup>. (C) Furthermore, IgD<sup>+</sup> cells did not express the proliferation marker Ki67, were IgM<sup>+</sup> and had not switched to IgG1.

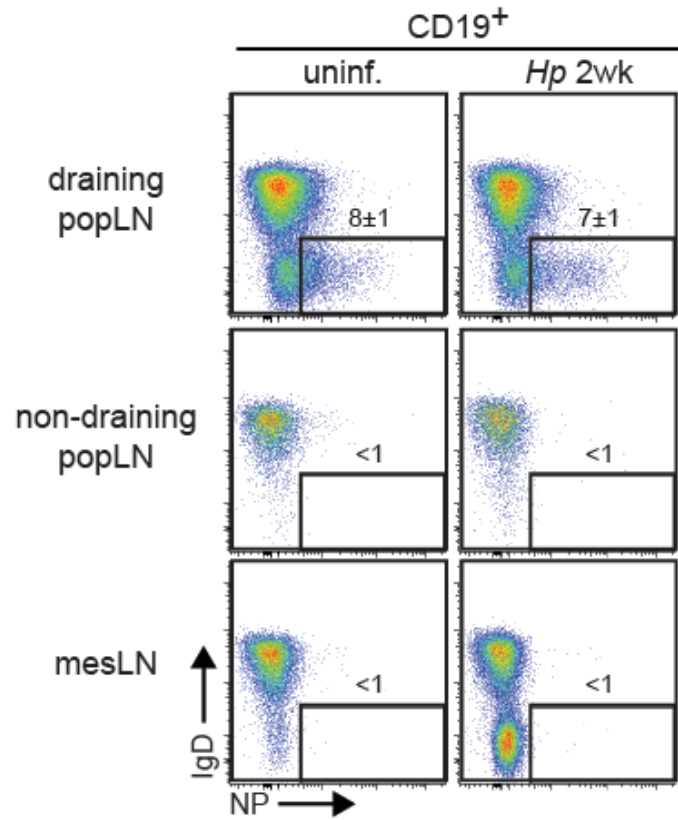

**Figure S2. The NP-specific B cell response to s.c immunization with NP-KLH in alum.**

BALB/c mice were infected with *Hp* or remained naive as described in Figure 6A, B. Three weeks later the animals were immunized into one footpad with the T-dependent antigen NP-KLH in alum adjuvant. Ten days after immunization (31 days post-infection), the frequency of IgD<sup>-</sup> isotype switched NP-specific B cells in the draining popliteal LN (popLN), the non-draining popLNs, and the mesLN were determined by flow cytometry.

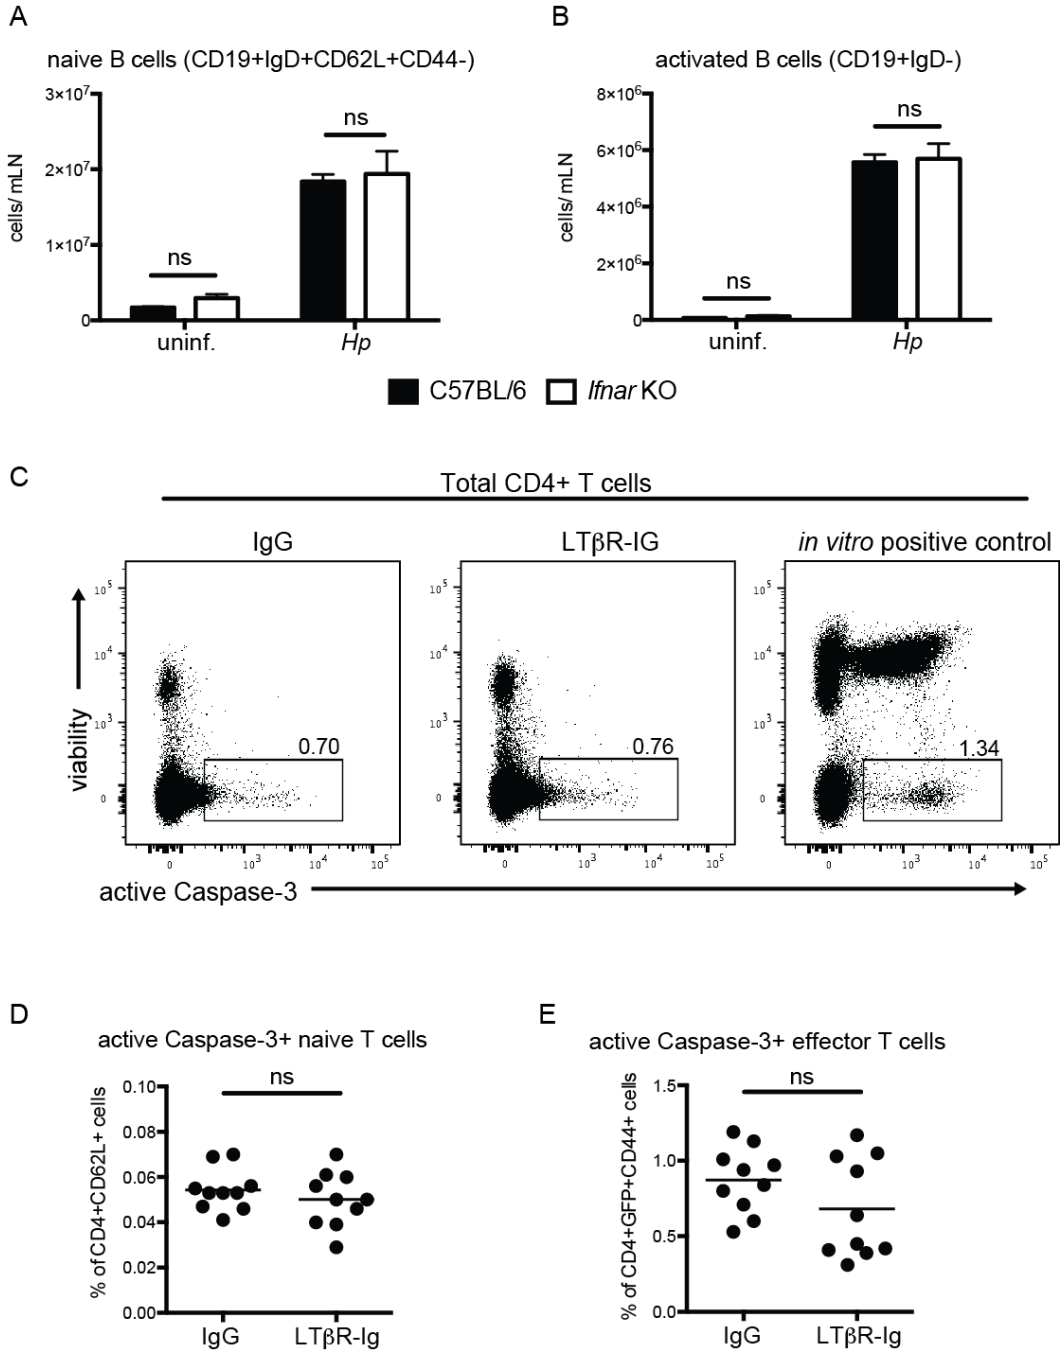

**Figure S3. Regulation of B cell accumulation and T cell survival by IFN $\alpha$ R and LT $\beta$ R signals, respectively.** (A, B) C57BL/6 or *Ifnar*-deficient mice were infected with *Hp* or remained naive and the mesLN were analyzed 2 weeks later by flow cytometry. (A) and (B) indicate the number of naïve or activated B cells from the mesLN of the indicated mice, respectively. (C-E) C57BL/6 4get mice were infected with *Hp* and LT $\beta$ R-Ig or control human IgG was administered i.p. on days 7 and 10 after infection. (C) Representative dot plots of the total mesLN CD4<sup>+</sup> T cell population at 2 wks post-*Hp* infection. Numbers indicate the frequency of active Caspase-3<sup>+</sup> cells assessed *ex vivo*. As a positive staining control for active Caspase-3, some mesLN were cultured overnight in complete media prior to staining. (D) and (E) indicated the percent of naïve or effector CD4<sup>+</sup> T cells that are active Caspase-3<sup>+</sup>, respectively. All the data shown is pooled from two independent experiments with 3-5 mice/group. ns, not significant.
